# Supplementary material for: Eu3+-functionalized CQD hybrid material: synthesis, luminescence properties and sensing application for the detection of Cu2+
Source: Royal Society of Chemistry journal article supplement (doi:10.1039/d1ma00059d), 2021-01-01
Supplement: d1ma00059d1.pdf [file d1ma00059d1.pdf]

## Supporting Information

# **Eu<sup>3+</sup> Functionalized CQDs Hybrid Material: Synthesis, Luminescent Properties and Sensing Application for the Detection of Cu<sup>2+</sup>**

**Ying Li<sup>1</sup>, Dan Liu<sup>1</sup>, Ya-Qi Wang<sup>1</sup>, Fang-Fang Wang<sup>2</sup>, Han-xun Qiu<sup>1,\*</sup>**

<sup>1</sup> School of Materials Science & Engineering, University of Shanghai for Science and Technology,  
Shanghai 200093, P. R. China

<sup>2</sup> The National Facility for Protein Science in Shanghai (NFPS), Shanghai 201210, P. R. China

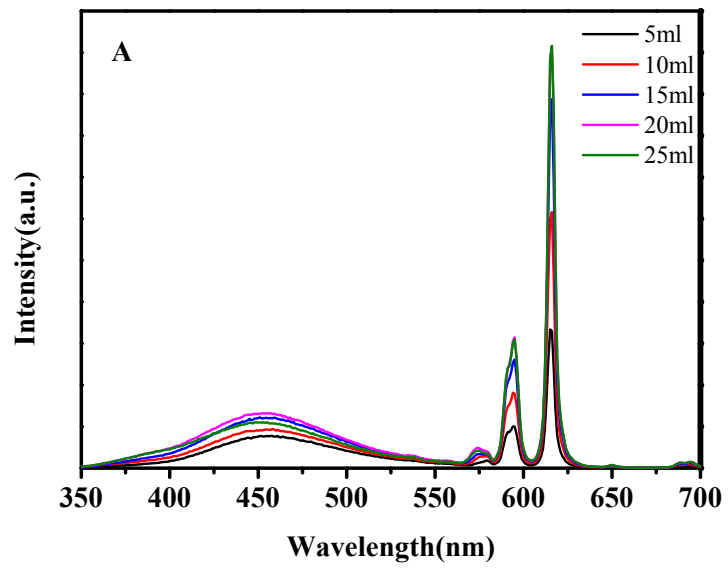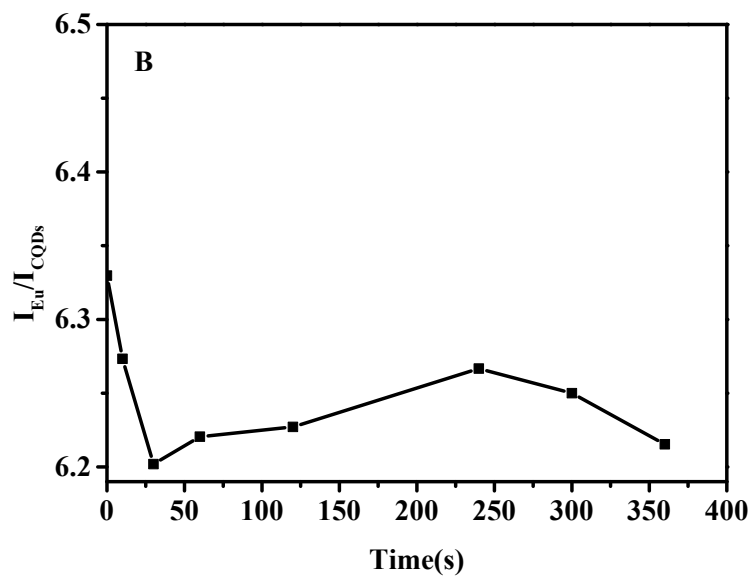

Fig.S1

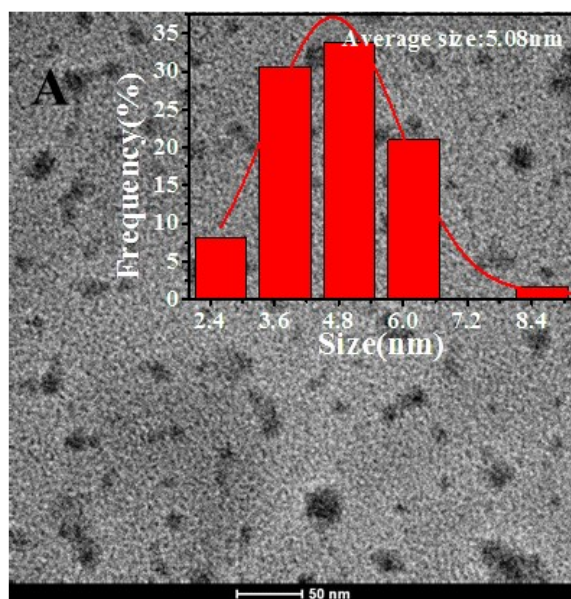

Fig.S2

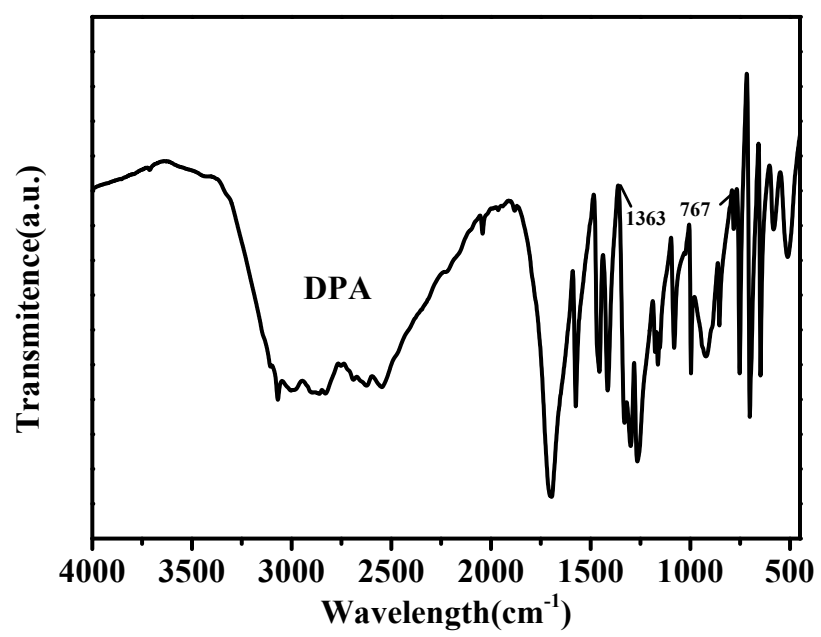

Fig.S3

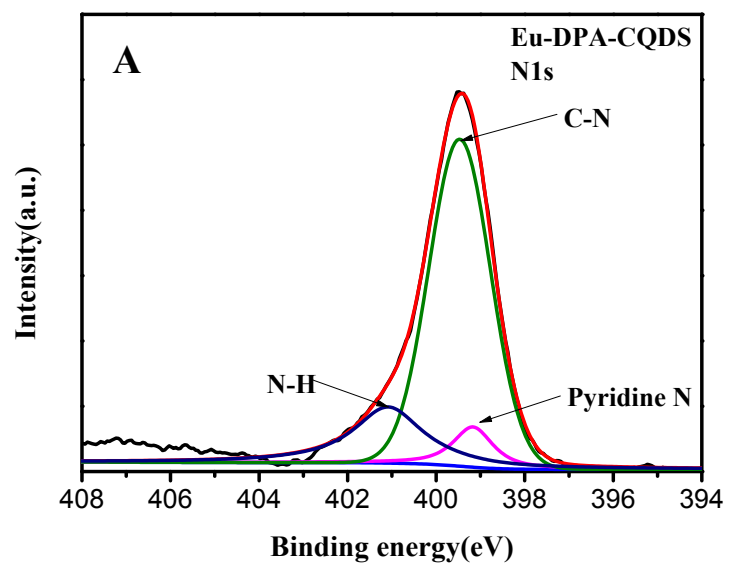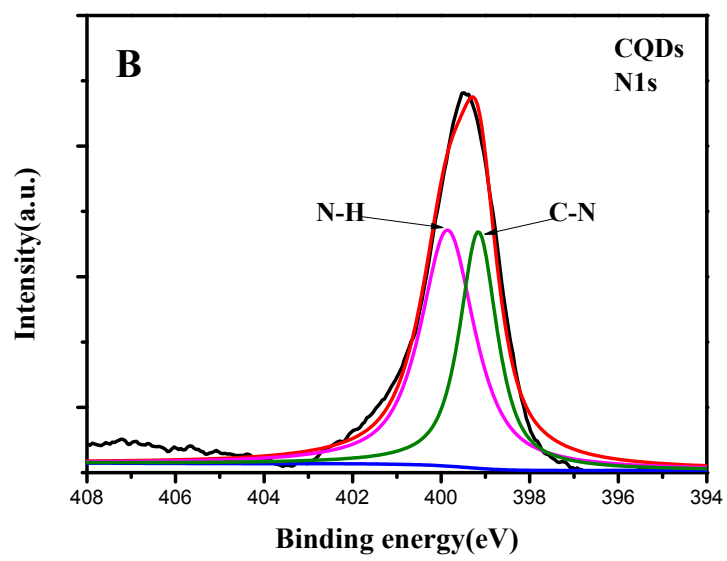

Fig.S4

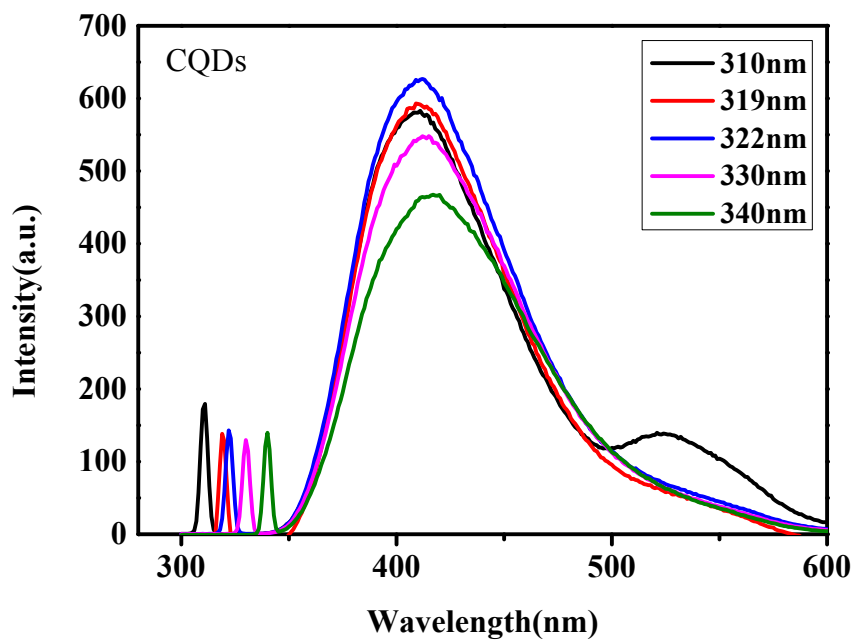

Fig.S5

Table S1. Comparison of analytical methods for Cu<sup>2+</sup> detection

| Fluorescent probe                                                 | Applications               | Lod(nmol/L) | Read out    | Linear range(umol/L) | Refs                            |
|-------------------------------------------------------------------|----------------------------|-------------|-------------|----------------------|---------------------------------|
| Lys-BSA-F-CNPs                                                    | tap water                  | 0.58 pM     | Turn-off    | 0.002–1.5 nM         | Liu et al., 2012a <sup>33</sup> |
| TPEA-F-CNPs                                                       | Cells                      | 10 nM       | Turn-off    | 1–100 μM             | Qu et al., 2012a <sup>34</sup>  |
| CdSe/ZnS QDs                                                      | Cells                      | 1 μM        | Ratiometric | 1–100 μM             | Zhu et al., 2012 <sup>35</sup>  |
| Amino-GQDs                                                        | Cells                      | 6.9 nM      | Turn-off    | 0–100 nM             | Sun et al., 2013 <sup>36</sup>  |
| BPEI-CQDs,<br>MOFs                                                | River water                | 80 pM       | Turn-off    | 2–1000 nM            | Lin et al., 2014 <sup>37</sup>  |
| GQDs                                                              | Synthetic<br>water samples | 0.226 μM    | Turn-off    | 0–15 μM              | Wang et al., 2014 <sup>38</sup> |
| Cs <sub>3</sub> Bi <sub>2</sub> Br <sub>9</sub> :Eu <sup>3+</sup> | water                      | 10 nM       | Turn-off    | 5 nM-3 μM            | Ding et al., 2019 <sup>39</sup> |
| Eu-DPA-CQDs                                                       | Synthetic<br>water samples | 6 nM        | Ratiometric | 0-125 μM             | this work                       |
